# Supplementary material for: A Bench-Top Approach for Isolation of Single Antibody Producing Chinese Hamster Ovary (CHO) Cells Using a Microwell-Based Microfluidic Device
Source: MDPI journal article supplement (doi:10.3390/mi13111939), 2022-11-10
Supplement: s1 [file s1]

## Supplementary material S1

Distribution map of trapped cells in the MBM device using different concentrations of cell suspension (10,000-17,500 cells/mL). 12 tables contain 10 x 20 cells represent the microwells presented in the device. Cells were added into the device from position the right to the left. The cell colored in red represent well with 1 cell. White wells are empty cells.

### Cell loading concentration at 10,000 cells/mL

Rep. 1 Total cell trapped number = 418 cells

|   | 1 | 2 | 3 | 4 | 5 | 6 | 7 | 8 | 9 | 10 | 11 | 12 | 13 | 14 | 15 | 16 | 17 | 18 | 19 | 20 |
|---|---|---|---|---|---|---|---|---|---|----|----|----|----|----|----|----|----|----|----|----|
| A |   | 2 | 3 |   | 1 |   |   | 1 | 2 | 1  | 2  | 5  | 2  |    |    | 3  | 6  | 5  | 4  | 10 |
| B |   |   |   | 2 |   | 1 | 1 |   | 1 |    | 2  |    | 1  |    | 2  | 4  | 5  | 3  | 3  | 5  |
| C | 5 |   |   | 1 | 4 | 2 | 5 | 1 |   | 2  | 1  | 6  |    | 3  | 3  | 5  | 3  | 5  | 6  | 6  |
| D |   | 3 | 1 | 2 | 1 |   |   | 1 | 2 | 3  | 2  | 4  |    | 1  | 4  | 5  | 2  | 3  | 8  | 11 |
| E | 2 |   | 3 | 2 | 2 | 1 | 1 | 4 |   | 3  |    | 5  |    | 2  | 3  | 2  |    | 2  | 6  | 4  |
| F |   |   |   |   | 1 |   |   | 2 | 1 |    | 2  | 9  |    | 3  | 2  | 3  | 3  |    | 6  | 15 |
| G | 1 | 3 | 2 | 1 | 2 | 5 |   |   |   | 1  |    |    | 3  | 6  | 2  | 3  | 2  |    | 5  | 13 |
| H | 2 |   |   | 3 | 2 | 2 |   |   | 2 | 2  | 2  |    | 5  |    |    | 5  |    | 3  |    | 10 |
| I |   |   |   |   |   | 1 |   | 1 | 2 |    | 1  |    | 2  | 4  |    | 6  |    |    |    | 6  |
| J |   |   |   | 2 |   |   | 1 |   | 3 |    |    | 2  |    | 3  | 3  |    | 3  | 4  | 3  | 7  |

Rep. 2 Total cell trapped number = 525 cells

|   | 1 | 2 | 3 | 4 | 5 | 6 | 7 | 8 | 9 | 10 | 11 | 12 | 13 | 14 | 15 | 16 | 17 | 18 | 19 | 20 |
|---|---|---|---|---|---|---|---|---|---|----|----|----|----|----|----|----|----|----|----|----|
| A |   | 1 | 2 | 2 | 2 |   | 2 | 1 | 1 |    |    | 4  | 1  | 3  | 3  | 4  |    |    | 5  | 9  |
| B |   |   | 1 | 4 | 1 | 1 |   | 2 |   |    | 3  | 3  | 4  | 1  | 6  | 2  | 3  | 2  | 4  | 13 |
| C |   |   |   |   | 5 |   | 2 |   | 2 | 5  |    | 2  |    | 2  | 4  | 7  |    | 11 | 12 | 2  |
| D |   | 5 | 1 | 1 |   | 2 |   | 3 |   | 4  | 1  | 4  |    | 5  |    | 8  | 2  | 3  | 10 | 8  |
| E | 2 |   | 2 |   | 1 | 6 | 2 | 2 | 1 | 3  |    | 5  |    | 6  | 2  | 4  | 3  | 3  | 5  | 15 |
| F |   |   | 2 | 2 |   | 2 | 1 |   | 4 | 1  |    | 4  | 1  | 4  | 3  | 4  |    | 7  |    | 16 |
| G | 2 | 3 | 1 | 1 | 3 | 9 | 2 | 7 | 5 | 3  | 3  | 3  |    | 7  | 1  | 5  | 2  | 5  | 4  | 12 |
| H | 6 |   | 4 | 5 |   |   | 1 |   | 1 |    |    | 2  | 2  | 4  | 4  | 9  | 3  | 3  | 3  | 9  |
| I |   |   |   | 1 | 2 | 1 | 2 |   |   | 1  | 3  | 4  |    | 3  | 2  | 7  | 5  | 4  | 2  | 4  |
| J |   | 1 |   | 2 |   |   | 1 |   | 3 |    |    | 2  |    | 3  | 3  | 5  |    | 7  | 3  | 6  |

Rep. 3 Total cell trapped number = 486 cells

|   | 1 | 2 | 3 | 4 | 5 | 6 | 7 | 8 | 9 | 10 | 11 | 12 | 13 | 14 | 15 | 16 | 17 | 18 | 19 | 20 |
|---|---|---|---|---|---|---|---|---|---|----|----|----|----|----|----|----|----|----|----|----|
| A |   | 1 |   |   |   | 1 | 3 | 1 | 1 |    | 2  |    |    |    |    | 6  | 4  | 3  | 7  | 11 |
| B |   |   |   | 2 | 1 | 1 |   |   | 1 |    | 1  | 2  |    | 6  | 1  | 5  |    | 4  | 3  | 9  |
| C |   | 3 |   | 2 |   | 2 |   |   |   | 3  | 1  |    | 2  | 5  |    | 4  | 5  | 4  | 12 | 11 |
| D |   | 2 | 1 |   | 2 |   | 4 |   | 2 |    |    |    | 1  |    | 4  | 7  | 3  | 6  | 7  | 19 |
| E | 5 | 4 | 3 |   | 8 |   |   | 3 |   | 1  | 2  | 3  | 2  | 6  | 4  | 5  | 3  | 5  | 4  | 12 |
| F | 1 |   |   | 2 |   | 1 | 1 |   |   | 2  |    |    |    | 4  |    | 7  | 4  | 8  | 3  | 8  |
| G | 1 |   | 1 | 4 | 6 |   | 1 |   | 1 |    |    | 4  |    | 3  |    | 8  | 4  | 9  | 13 | 9  |
| H | 2 |   |   |   |   |   | 2 | 4 |   |    |    |    | 1  |    | 5  | 5  |    | 5  | 6  | 9  |
| I |   |   |   | 1 | 2 | 3 |   |   | 5 | 2  |    | 1  |    |    | 3  | 4  |    | 7  | 15 | 5  |
| J |   |   |   |   |   | 2 |   |   |   | 1  | 2  | 3  |    |    |    | 6  | 4  | 9  | 5  | 4  |

# Cell loading concentration at 12,500 cells/mL

Rep.1

Total cell trapped number loading = 701 cells

|   | 1 | 2 | 3 | 4 | 5 | 6 | 7 | 8 | 9 | 10 | 11 | 12 | 13 | 14 | 15 | 16 | 17 | 18 | 19 | 20 |
|---|---|---|---|---|---|---|---|---|---|----|----|----|----|----|----|----|----|----|----|----|
| A |   |   | 3 | 1 | 3 | 1 | 1 | 2 |   | 1  | 1  | 1  | 2  | 1  | 2  |    | 1  | 7  | 4  | 18 |
| B | 1 | 3 | 5 | 3 | 2 | 5 |   | 1 |   | 3  | 2  |    |    | 4  | 3  | 7  | 4  | 7  |    | 15 |
| C | 2 |   | 3 | 1 | 2 | 1 | 2 | 1 | 1 | 3  | 1  | 2  | 1  | 4  | 4  | 1  | 7  | 8  | 15 | 17 |
| D | 1 | 4 | 4 | 1 | 3 | 2 | 1 |   | 3 | 1  | 1  | 3  | 3  |    | 7  | 8  | 6  | 10 | 8  | 19 |
| E | 1 | 5 | 1 | 3 | 1 | 5 | 1 | 2 | 1 | 2  | 4  | 2  |    | 1  | 4  | 9  |    | 8  | 9  | 10 |
| F |   | 3 | 6 | 9 |   | 1 |   | 3 | 2 | 1  | 2  | 1  | 3  |    | 5  | 9  | 7  | 12 | 9  | 9  |
| G |   | 4 | 1 | 2 | 1 | 1 | 2 |   | 1 | 2  | 1  | 3  | 4  |    | 6  | 6  | 15 | 8  | 8  | 12 |
| H |   | 5 | 4 | 3 | 2 | 1 |   | 1 | 1 | 2  |    | 2  | 1  | 1  | 5  |    | 5  | 9  | 17 |    |
| I | 3 |   | 3 | 1 | 3 |   | 2 | 4 | 3 | 1  | 3  | 1  | 1  | 3  | 5  | 8  | 14 | 3  | 7  | 15 |
| J | 1 | 5 | 2 | 1 |   | 3 | 1 | 1 |   | 1  | 4  |    | 1  | 2  | 3  | 9  | 5  | 5  | 15 |    |

Rep. 2

Total cell trapped number loading = 855 cells

|   | 1 | 2 | 3 | 4 | 5 | 6 | 7 | 8 | 9 | 10 | 11 | 12 | 13 | 14 | 15 | 16 | 17 | 18 | 19 | 20 |
|---|---|---|---|---|---|---|---|---|---|----|----|----|----|----|----|----|----|----|----|----|
| A | 1 |   | 2 | 1 | 4 | 4 | 3 | 1 | 3 | 1  |    |    | 5  | 3  | 1  | 4  | 5  | 11 | 19 | 16 |
| B |   | 1 |   | 1 |   | 1 | 1 | 3 | 1 |    | 3  | 1  | 5  | 15 | 4  |    | 9  | 17 | 17 | 14 |
| C | 4 | 3 | 1 | 3 | 1 | 3 | 1 | 1 | 1 | 1  |    |    |    | 6  | 6  | 8  | 10 | 14 | 16 | 18 |
| D | 2 | 1 | 1 | 3 |   | 1 | 3 | 1 | 4 |    | 1  | 1  |    | 1  | 8  |    | 11 | 16 | 15 | 20 |
| E |   | 4 | 5 | 2 | 1 | 4 | 1 |   | 3 | 1  | 1  | 5  | 3  | 2  | 9  | 5  | 8  | 17 | 18 | 7  |
| F | 1 | 4 | 3 | 5 |   | 5 |   | 4 | 1 | 3  | 2  | 3  | 5  | 5  | 5  | 9  | 18 | 11 | 9  | 11 |
| G | 2 |   | 1 | 1 |   | 1 |   | 1 |   | 1  | 5  | 1  |    | 1  | 4  | 10 | 5  | 18 | 8  | 10 |
| H | 1 | 7 | 3 |   | 5 | 1 | 3 | 5 | 1 | 1  | 1  | 4  |    |    | 5  | 5  | 6  | 19 | 9  | 9  |
| I |   | 3 | 5 | 3 | 4 |   |   | 1 | 1 | 1  |    | 1  | 3  | 5  | 3  |    | 7  | 8  | 17 | 13 |
| J |   | 2 | 1 |   | 1 |   | 1 | 2 |   | 3  | 1  | 3  | 3  | 1  | 3  | 8  | 6  | 6  | 10 | 12 |

Rep. 3

Total cell trapped number loading = 894 cells

|   | 1 | 2 | 3 | 4 | 5 | 6 | 7 | 8 | 9 | 10 | 11 | 12 | 13 | 14 | 15 | 16 | 17 | 18 | 19 | 20 |
|---|---|---|---|---|---|---|---|---|---|----|----|----|----|----|----|----|----|----|----|----|
| A | 4 | 1 |   |   | 1 |   | 1 | 3 | 1 |    | 1  |    | 6  | 1  | 5  | 14 | 9  | 10 | 9  | 20 |
| B |   | 3 | 1 | 1 | 1 |   | 4 | 1 | 4 |    | 1  | 5  | 9  | 9  | 6  | 9  |    | 15 | 9  | 18 |
| C | 6 | 5 | 3 | 1 |   | 4 | 1 | 2 |   | 1  | 1  |    | 1  | 5  |    | 13 | 7  | 8  | 10 | 9  |
| D | 2 | 1 | 1 | 5 | 6 | 1 | 6 | 3 | 3 | 4  | 5  | 1  | 4  | 3  | 9  | 6  | 14 | 6  | 11 | 10 |
| E |   | 3 | 2 | 1 | 4 | 5 |   | 2 | 1 | 4  | 1  | 1  | 5  |    | 1  | 1  | 16 | 16 | 15 | 15 |
| F | 3 | 1 |   | 3 | 1 | 1 | 1 | 1 | 5 | 1  |    |    |    | 1  | 6  | 9  | 17 | 15 | 16 | 14 |
| G |   |   | 1 | 3 | 3 | 6 | 1 | 1 | 1 | 4  | 6  |    | 1  | 3  |    | 14 |    | 13 | 14 | 9  |
| H |   | 3 |   | 2 | 1 | 5 | 6 | 4 |   | 3  | 1  | 5  | 6  | 3  | 7  | 5  | 15 | 19 | 15 | 15 |
| I | 2 | 1 | 4 | 1 | 1 | 4 | 7 | 3 |   | 4  |    | 1  |    | 6  | 1  | 3  | 8  | 4  | 19 | 20 |
| J |   | 2 |   |   | 4 | 1 | 3 | 1 |   | 1  |    |    | 1  | 7  |    | 1  | 16 | 9  | 11 | 5  |

# Cell loading concentration at 15,000 cells/mL

Rep. 1

Total cell trapped number = 1,114 cells

|   | 1 | 2 | 3 | 4 | 5 | 6 | 7 | 8 | 9 | 10 | 11 | 12 | 13 | 14 | 15 | 16 | 17 | 18 | 19 | 20 |
|---|---|---|---|---|---|---|---|---|---|----|----|----|----|----|----|----|----|----|----|----|
| A | 1 | 1 | 1 | 1 | 1 |   | 5 | 1 |   |    | 1  | 1  | 3  | 1  | 3  | 16 | 3  | 9  | 12 | 15 |
| B |   | 5 | 5 | 9 | 4 | 6 | 2 | 8 | 4 | 1  | 4  | 4  | 5  | 1  | 9  | 14 | 12 | 10 | 24 | 10 |
| C | 1 | 1 | 1 | 7 | 1 | 3 | 1 | 1 | 1 | 1  |    | 4  | 1  | 5  | 14 | 13 | 12 | 13 | 14 | 25 |
| D |   | 1 | 3 | 1 | 1 | 4 | 4 | 6 | 1 | 1  | 9  | 3  | 15 | 12 | 23 | 13 | 13 | 14 | 14 | 23 |
| E | 1 | 1 | 1 | 6 | 1 | 3 | 3 | 7 | 1 | 1  | 9  | 1  | 1  | 3  | 12 | 15 | 9  | 13 | 13 | 29 |
| F |   | 1 | 2 | 8 | 7 | 3 | 5 | 1 | 4 |    | 4  | 1  | 1  | 14 | 12 | 13 | 16 | 1  | 4  | 38 |
| G | 1 | 5 | 1 | 3 | 9 | 6 | 9 | 1 | 1 | 1  | 1  |    | 1  | 15 | 1  | 4  | 15 | 5  | 12 | 5  |
| H | 6 | 8 | 3 | 9 | 5 | 5 | 3 |   |   | 1  | 3  | 4  | 1  | 4  | 1  | 7  | 3  | 1  | 3  | 10 |
| I |   | 6 | 1 | 4 | 1 | 5 | 2 | 3 | 1 |    | 6  | 7  | 4  | 3  | 3  | 13 | 19 | 5  | 12 | 9  |
| J |   | 5 | 1 | 1 | 1 | 1 | 1 | 1 | 1 |    |    | 1  | 13 | 9  | 1  | 8  | 14 | 2  | 15 | 5  |

Rep. 2

Total cell trapped number = 1,017 cells

|   | 1 | 2 | 3 | 4 | 5 | 6 | 7 | 8 | 9 | 10 | 11 | 12 | 13 | 14 | 15 | 16 | 17 | 18 | 19 | 20 |
|---|---|---|---|---|---|---|---|---|---|----|----|----|----|----|----|----|----|----|----|----|
| A |   | 5 | 5 | 1 | 1 | 1 |   |   | 2 |    | 1  | 1  | 2  | 5  | 8  | 17 | 15 | 16 | 16 | 19 |
| B |   | 1 | 2 | 1 | 1 | 4 | 1 | 5 | 6 |    | 1  |    | 3  | 1  | 3  | 1  | 1  | 10 | 17 | 25 |
| C | 1 |   | 3 | 5 | 2 | 2 | 1 | 3 | 2 | 1  | 3  | 3  | 2  | 2  | 1  | 13 | 13 | 13 | 16 | 32 |
| D | 1 | 1 | 3 | 8 | 8 | 1 | 2 | 1 | 5 | 4  | 1  | 3  | 1  | 4  | 8  | 3  | 13 | 12 | 15 | 30 |
| E | 1 | 1 | 6 | 3 | 1 |   | 1 | 3 | 2 | 7  | 3  | 4  | 5  | 9  | 1  | 18 | 14 | 16 | 10 | 16 |
| F | 2 | 5 | 3 | 2 | 1 | 1 | 1 | 8 | 9 | 2  | 1  | 2  | 1  | 1  | 8  | 9  | 12 | 10 | 13 | 6  |
| G | 5 | 7 | 8 | 1 | 1 | 3 | 2 | 1 | 2 | 1  | 3  | 6  | 7  | 9  | 4  | 1  | 9  | 9  | 18 | 5  |
| H | 3 | 1 | 1 | 2 | 1 | 2 | 1 | 2 | 3 | 1  | 3  | 5  | 2  | 1  | 4  | 1  | 15 | 12 | 18 | 9  |
| I | 1 | 1 | 1 | 2 | 1 | 1 | 8 |   | 1 | 3  | 1  |    | 9  | 9  | 5  | 12 | 4  | 13 | 9  | 15 |
| J |   | 5 |   |   | 1 | 5 | 6 | 2 |   | 2  |    |    | 1  | 5  | 6  | 1  | 3  | 14 | 11 | 12 |

Rep. 3

Total cell trapped number = 1,073 cells

|   | 1 | 2 | 3 | 4 | 5 | 6 | 7 | 8 | 9 | 10 | 11 | 12 | 13 | 14 | 15 | 16 | 17 | 18 | 19 | 20 |
|---|---|---|---|---|---|---|---|---|---|----|----|----|----|----|----|----|----|----|----|----|
| A |   | 6 | 2 | 1 | 1 | 2 | 8 | 2 | 1 |    | 1  | 1  |    | 8  | 18 | 7  | 15 | 16 | 15 | 16 |
| B |   | 1 | 8 | 1 | 1 | 1 |   | 1 | 1 | 8  | 1  | 1  | 2  | 12 | 13 | 1  | 1  | 17 | 13 | 15 |
| C | 1 | 1 | 4 | 9 | 9 | 3 | 2 | 1 |   | 1  | 4  | 3  |    | 3  | 1  | 3  | 3  | 1  | 19 | 12 |
| D | 1 | 1 | 6 | 9 | 1 | 9 | 4 | 1 | 1 | 6  | 1  | 3  | 3  | 1  | 1  | 13 | 13 | 9  | 16 | 30 |
| E | 1 | 1 | 8 | 2 | 1 | 1 | 1 | 4 |   | 4  | 2  | 1  | 2  | 1  | 3  | 18 | 14 | 16 | 16 | 16 |
| F | 2 | 1 | 5 | 1 |   | 7 | 1 | 9 | 8 | 1  | 7  | 1  | 14 | 5  | 13 | 13 | 12 | 18 | 16 | 19 |
| G | 7 | 5 | 1 | 1 | 1 |   | 1 | 3 | 2 |    | 1  | 4  | 1  | 1  | 1  | 1  | 4  | 23 | 19 | 18 |
| H | 1 | 1 | 6 | 2 |   | 1 |   | 1 | 1 | 2  | 2  | 15 | 1  | 9  | 3  | 1  | 1  | 9  | 15 | 12 |
| I | 1 | 1 |   | 1 | 1 | 1 | 1 | 1 | 3 | 3  | 3  | 2  | 14 |    | 2  | 12 | 14 | 13 | 8  | 17 |
| J | 1 |   | 7 | 1 | 9 | 7 |   | 5 | 1 | 2  |    | 9  | 8  | 5  |    | 6  | 13 | 4  | 14 | 14 |

# Cell loading concentration at 17,500 cells/mL

Rep.1

Total cell trapped number = 1,318 cells

|   | 1 | 2 | 3 | 4 | 5 | 6 | 7 | 8 | 9 | 10 | 11 | 12 | 13 | 14 | 15 | 16 | 17 | 18 | 19 | 20 |
|---|---|---|---|---|---|---|---|---|---|----|----|----|----|----|----|----|----|----|----|----|
| A | 5 | 6 | 5 | 5 | 5 | 4 | 4 | 6 | 6 | 8  | 5  | 9  | 7  | 6  |    | 17 | 5  | 18 | 6  | 16 |
| B | 6 | 5 | 3 | 7 | 1 | 5 | 6 | 4 | 3 | 9  | 6  | 2  | 8  | 11 |    | 11 | 4  | 14 | 7  | 15 |
| C | 5 | 3 | 5 | 1 | 1 | 7 | 1 | 1 | 9 | 4  | 1  | 1  | 8  | 2  | 5  | 4  | 3  | 30 | 16 | 20 |
| D | 7 | 5 | 9 | 2 | 1 | 6 | 8 | 8 | 8 | 1  | 6  | 1  | 12 | 14 | 5  | 4  | 13 | 24 | 15 | 25 |
| E | 5 | 1 | 6 | 1 | 1 | 8 | 5 | 5 | 7 | 1  | 1  | 6  | 5  | 1  | 12 | 6  | 4  | 19 | 10 | 26 |
| F | 8 | 5 | 3 | 2 | 4 | 3 | 5 | 7 | 1 | 6  | 7  | 8  | 11 | 4  |    | 9  | 2  | 14 | 14 | 17 |
| G |   | 3 | 7 | 3 | 7 | 5 | 4 | 7 | 1 | 4  | 3  | 1  | 5  | 8  | 1  | 3  | 14 | 13 | 15 | 15 |
| H | 8 | 3 | 4 | 5 | 1 | 6 | 5 |   | 4 | 8  | 4  | 1  | 1  | 11 | 4  | 3  | 5  | 20 | 8  | 14 |
| I | 7 | 4 | 1 | 1 | 5 | 4 | 3 | 2 | 1 | 5  |    | 7  | 1  | 2  | 9  | 3  | 14 | 15 | 19 | 19 |
| J | 4 | 6 | 4 | 3 | 1 | 1 | 4 | 5 | 1 |    | 8  | 3  | 1  | 4  | 16 | 5  | 13 | 16 | 16 | 20 |

Rep. 2

Total cell trapped number = 1,386 cells

|   | 1 | 2 | 3 | 4 | 5 | 6 | 7 | 8 | 9 | 10 | 11 | 12 | 13 | 14 | 15 | 16 | 17 | 18 | 19 | 20 |
|---|---|---|---|---|---|---|---|---|---|----|----|----|----|----|----|----|----|----|----|----|
| A | 5 | 1 | 5 | 7 | 1 |   | 1 | 4 | 3 | 6  | 1  | 2  | 7  | 4  | 16 | 7  | 15 | 8  | 4  | 20 |
| B | 6 | 7 | 6 | 8 | 4 | 5 | 1 |   | 5 | 8  | 1  | 4  | 9  | 13 | 3  | 11 | 14 | 6  | 17 | 23 |
| C | 8 | 5 | 3 | 4 | 4 | 4 | 1 | 4 | 1 | 7  | 3  | 3  | 10 | 12 | 1  | 14 | 13 | 20 | 17 | 22 |
| D | 7 | 4 | 4 | 3 | 1 | 5 | 1 | 6 | 5 | 3  | 5  | 15 | 2  | 4  | 1  | 7  | 13 | 14 | 16 | 25 |
| E | 4 | 3 | 7 | 4 | 8 | 3 | 9 | 1 | 1 | 3  | 4  |    | 10 | 4  | 2  | 8  | 14 | 9  | 12 | 36 |
| F | 7 | 1 | 5 | 1 | 5 | 9 | 1 | 6 | 5 |    | 2  | 1  | 9  | 1  | 4  | 8  | 23 | 24 | 6  | 27 |
| G | 6 | 1 | 7 | 4 | 4 | 9 | 6 | 9 | 4 | 5  |    | 5  | 1  | 1  | 3  | 8  | 16 | 23 | 5  | 35 |
| H | 7 | 7 | 1 | 1 | 4 | 8 |   | 1 | 1 | 4  | 1  | 7  | 9  | 4  | 7  | 9  | 4  | 10 | 18 | 4  |
| I | 8 | 6 | 9 | 5 |   | 9 | 6 | 1 | 3 | 3  | 3  |    | 9  | 5  | 19 | 13 | 16 | 5  | 9  | 9  |
| J | 5 | 9 | 8 |   | 4 | 4 | 3 |   | 3 | 2  |    |    | 6  | 14 | 6  | 15 | 16 | 6  | 26 | 10 |

Rep. 3

Total cell trapped number = 1,496 cells

|   | 1 | 2 | 3 | 4  | 5 | 6 | 7 | 8 | 9 | 10 | 11 | 12 | 13 | 14 | 15 | 16 | 17 | 18 | 19 | 20 |
|---|---|---|---|----|---|---|---|---|---|----|----|----|----|----|----|----|----|----|----|----|
| A | 1 | 7 | 1 | 10 | 3 | 4 | 5 | 1 | 2 | 5  | 5  | 1  | 1  |    | 6  | 17 | 5  | 2  | 14 | 10 |
| B | 3 | 2 | 5 | 2  | 1 | 5 | 3 | 4 | 8 | 1  | 10 | 5  | 7  | 3  | 13 | 21 | 12 | 16 | 20 | 34 |
| C | 7 | 2 | 9 | 5  | 3 | 1 | 6 | 5 | 4 | 5  | 5  | 1  | 15 | 12 | 2  | 12 | 16 | 30 | 7  | 12 |
| D | 4 | 3 | 1 | 3  | 1 | 6 | 8 | 8 | 1 | 3  | 1  | 8  | 12 | 14 | 3  | 17 | 14 | 24 | 6  | 25 |
| E | 8 | 7 | 1 | 3  | 5 | 1 | 1 | 1 | 4 | 4  | 3  | 12 | 13 | 5  | 12 | 18 | 4  | 19 | 2  | 25 |
| F | 2 | 1 | 3 | 6  | 1 | 2 | 4 | 7 | 8 | 2  | 1  | 5  | 5  | 10 | 14 | 6  | 13 | 14 | 30 | 20 |
| G | 2 | 4 | 9 | 6  | 5 | 9 | 3 | 4 | 1 | 9  | 4  | 6  | 4  | 4  |    | 19 | 13 | 23 | 15 | 30 |
| H | 1 | 7 | 5 | 4  | 8 | 1 | 4 | 3 | 3 | 6  | 5  | 1  | 7  | 3  | 17 |    | 14 | 12 | 21 | 16 |
| I | 4 | 9 | 8 | 3  | 2 | 4 | 9 | 7 | 5 | 1  | 1  | 6  | 8  |    | 9  | 5  | 14 | 15 | 23 | 19 |
| J | 6 | 4 | 1 | 8  | 3 | 5 | 1 | 4 | 4 | 8  | 5  | 5  | 16 | 4  | 16 | 5  | 6  | 8  | 16 | 13 |



## Supplementary material S2

**Table S1** the raw data of the optimization of single cell trapped (%) using different cell loading concentration (cells mL<sup>-1</sup>).

| Cell loading concentration<br>(cells mL <sup>-1</sup> ) | Single cell trapped (%) |      |    |                   |     |
|---------------------------------------------------------|-------------------------|------|----|-------------------|-----|
|                                                         | #1                      | #2   | #3 | AVG               | STV |
| 10,000                                                  | 12.5                    | 13   | 12 | 12.5 <sup>a</sup> | 0.5 |
| 12,500                                                  | 25.5                    | 25.5 | 25 | 25.3 <sup>b</sup> | 0.3 |
| 15,000                                                  | 31                      | 28   | 34 | 31 <sup>c</sup>   | 3   |
| 17,500                                                  | 15.5                    | 14   | 14 | 14.5 <sup>a</sup> | 0.9 |

**Table S2** the raw data of the optimization of single cell trapped (%) using different settle time (min).

| Settle time (min) | Single cell trapped (%) |      |      |                   |     |
|-------------------|-------------------------|------|------|-------------------|-----|
|                   | #1                      | #2   | #3   | AVG               | STV |
| 1                 | 11                      | 7.5  | 12   | 10.2 <sup>a</sup> | 2.4 |
| 3                 | 16                      | 14.5 | 17.5 | 16 <sup>b</sup>   | 1.5 |
| 5                 | 32.5                    | 32   | 32   | 32.2 <sup>c</sup> | 0.3 |
| 7                 | 19.5                    | 17   | 16   | 17.5 <sup>a</sup> | 1.8 |
| 9                 | 4.5                     | 4.5  | 5    | 4.7 <sup>d</sup>  | 0.3 |

**Table S3** the raw data of efficiency of single cell isolation using limiting dilution and the microwell-based microfluidic device.

| Techniques        | Single cell trapped (%) |      |    |    |      |      |    |      |      |      | AVG     | STV |
|-------------------|-------------------------|------|----|----|------|------|----|------|------|------|---------|-----|
|                   | #1                      | #2   | #3 | #4 | #5   | #6   | #7 | #8   | #9   | #10  |         |     |
| Limiting dilution | 4.5                     | 6    | 5  | 6  | 5    | 5.5  | 6  | 3.5  | 5    | 5    | 5.2     | 0.8 |
| The MBM device    | 21                      | 28.5 | 23 | 25 | 28.5 | 17.5 | 15 | 29.5 | 27.5 | 27.5 | 24.3*** | 4.8 |

**Table S4** the raw data of time spent processing using limiting dilution.

| Tasks                       | Time (min) |      |      |      |      |      |      |      |      |      | AVG   | STV |
|-----------------------------|------------|------|------|------|------|------|------|------|------|------|-------|-----|
|                             | #1         | #2   | #3   | #4   | #5   | #6   | #7   | #8   | #9   | #10  |       |     |
| Cell preparation            | 10.2       | 5.2  | 4.5  | 10.3 | 5.7  | 6.1  | 5.3  | 4.5  | 5.8  | 5.2  | 6.3   | 2.2 |
| Cell loading                | 3.2        | 3.4  | 5.1  | 4.2  | 3.3  | 3.3  | 2.5  | 4.2  | 2.4  | 3.2  | 3.5   | 0.8 |
| Single cell assessment      | 31.2       | 15.2 | 12.3 | 12.5 | 12.8 | 22.3 | 18.1 | 31.2 | 12.3 | 13.5 | 18.14 | 7.6 |
| Total time-spent processing | 44.6       | 23.8 | 21.9 | 27   | 21.8 | 31.7 | 25.9 | 39.9 | 20.5 | 21.9 | 27.9  | 8.3 |

**Table S5** the raw data of time spent processing using microwell-based microfluidic device.

| Tasks                       | Time (min) |      |      |     |       |      |       |      |      |      | AVG  | STV |
|-----------------------------|------------|------|------|-----|-------|------|-------|------|------|------|------|-----|
|                             | #1         | #2   | #3   | #4  | #5    | #6   | #7    | #8   | #9   | #10  |      |     |
| Cell preparation            | 2.4        | 2.4  | 2.3  | 2.4 | 2.4   | 2.8  | 2.37  | 2.3  | 2.4  | 2.3  | 2.4  | 0.1 |
| Cell loading                | 8          | 8.1  | 8.2  | 8.1 | 8.55  | 7.3  | 7.3   | 7    | 7    | 8.1  | 7.7  | 0.6 |
| Single cell assessment      | 14.5       | 8.2  | 5.1  | 8.5 | 5     | 12   | 8.5   | 5.2  | 9.2  | 8.4  | 8.5  | 3   |
| Total time-spent processing | 24.9       | 18.7 | 15.6 | 19  | 15.95 | 22.1 | 18.17 | 14.5 | 18.6 | 18.8 | 18.6 | 3.1 |

**Table S6** the raw data of single cell trapped correctness (%) between experienced and novice testers performing limiting dilution.

| Testers     | Single cell determination accuracy (%) |      |     |     |     |      |      |
|-------------|----------------------------------------|------|-----|-----|-----|------|------|
|             | #1                                     | #2   | #3  | #4  | #5  | AVG  | STV  |
| Experienced | 100                                    | 83   | 90  | 83  | 70  | 85.3 | 9.8  |
| Novice      | 85.7                                   | 91.8 | 100 | 100 | 100 | 73.2 | 16.3 |

**Table S7** the raw data of single cell trapped correctness (%) between experienced and novice testers performing microwell-based microfluidic device.

| Testers     | Single cell determination accuracy (%) |      |      |      |     |      |      |
|-------------|----------------------------------------|------|------|------|-----|------|------|
|             | #1                                     | #2   | #3   | #4   | #5  | AVG  | STV  |
| Experienced | 85.7                                   | 91.8 | 100  | 100  | 100 | 95.5 | 5.8  |
| Novice      | 100                                    | 97.6 | 97.6 | 54.6 | 100 | 89.9 | 17.7 |
